# Supplementary material for: MDM2 and MDM4 Are Therapeutic Vulnerabilities in Malignant Rhabdoid Tumors
Source: Oxford University Press journal article supplement (doi:10.1158/0008-5472.can-18-3066), 2019-02-12
Supplement: 00085472can183066-sup-209661_2_supp_5325289_pmgwdx.xlsx [file 00085472can183066-sup-209661_2_supp_5325289_pmgwdx.xlsx]

## Sheet: S Table 1-Cell Lines
Cell Line	CCLE Name	Alias(es)	RRID	Type	Location	p53 status	MDM2 status	MDM4 status	Source	Media	Plating density (cells/96 well)	Notes		Material	Source		ATRT3 base media component	Amount (ml)	Source
A204	A204_SOFT_TISSUE	A-204	CVCL_1058	MRT	Soft Tissue	WT			American Type Culture Collection	McCoy's + 10% FBS + 1X Pen/Strep	5000			DMEM	Life Technologies/Thermo Fisher Scientific		Neurobasal -A Medium	500	Invitrogen/Thermo Fisher Scientific
A549	A549_LUNG	A-549	CVCL_0023	Lung Carcinoma	Lung	WT			American Type Culture Collection	DMEM + 10% FBS + 1X Pen/Strep	2500			EMEM	American Type Culture Collection		50/50 DMEM/F12	500	Life Technologies/Thermo Fisher Scientific
BT12	BT12_SOFT_TISSUE	BT-12	CVCL_M155	MRT	ATRT	WT			C. David James, Northwestern	Opti-MEM + 5% FBS + 1X Pen/Strep	5000			IMDM	Life Technologies/Thermo Fisher Scientific		Non Essential Amino Acids	10	Invitrogen/Thermo Fisher Scientific
BT16	BT16_SOFT_TISSUE	BT-16	CVCL_M156	MRT	ATRT	WT			C. David James, Northwestern	DMEM + 10% FBS + 1X Pen/Strep	2500			McCoy's	Life Technologies/Thermo Fisher Scientific		Sodium Pyruvate	10	Invitrogen/Thermo Fisher Scientific
ATRT3	ATRT3_SOFT_TISSUE	CHB ATRT3	N/A	MRT	ATRT	WT			Yoon-Jae Cho, OHSU	See Right	2500	Mixed suspension line		Opti-MEM	Life Technologies/Thermo Fisher Scientific		1M Hepes	25	Invitrogen/Thermo Fisher Scientific
CHLA266	CHLA266_SOFT_TISSUE	CHLA-266	CVCL_M149	MRT	ATRT	WT			Children's Oncology Group	IMDM + 20%FBS + 4mM Glutamine + 1X ITS + 1X Pen/Strep	10000			50/50 DMEM/F12	Life Technologies/Thermo Fisher Scientific		GlutaMAX	10	Invitrogen/Thermo Fisher Scientific
COGAR359	COGAR359_SOFT_TISSUE	COG-AR-359	CVCL_RS25	MRT	ATRT	WT			Children's Oncology Group	IMDM + 20%FBS + 4mM Glutamine + 1X ITS + 1X Pen/Strep	5000	Suspension line		Fetal Bovine Serum (FBS)	SAFC/Sigma Aldrich		Pen/Strep	10	Invitrogen/Thermo Fisher Scientific
DL	DL_SOFT_TISSUE	DL	CVCL_U760	MRT	Lung	WT			Yasumichi Kuwahara, Kyoto Prefectural University of Medicine	RPMI + 10% FBS + 1X Pen/Strep	10000			L-glutamine (200mM)	Life Technologies/Thermo Fisher Scientific
G401	G401_SOFT_TISSUE	G-401, G 401	CVCL_0270	MRT	Kidney	WT			American Type Culture Collection	DMEM + 10% FBS + 1X Pen/Strep	2500			Penicillin/Streptomycin	Life Technologies/Thermo Fisher Scientific		To 100 ml of base media add fresh:	Amount (ml)	Source
G402	G402_SOFT_TISSUE	G-402	CVCL_1221	MRT	Kidney	WT			American Type Culture Collection	McCoy's + 10% FBS + 1X Pen/Strep	5000	Appears to be some confusion with the RRID disease type designation.		Insulin-Transferrin-Selenium (ITS)	Life Technologies/Thermo Fisher Scientific		50X B27 - Vitamin A	2	Invitrogen/Thermo Fisher Scientific
HCT116	HCT116_LARGE_INTESTINE	HCT 116, HCT-116, HCT.116	CVCL_0291	Colorectal carcinoma	Colon	WT			American Type Culture Collection	McCoy's + 10% FBS + 1X Pen/Strep	2500						1000X EGF	0.1	Shenandoah/Thermo Fisher Scientific
HEYA8	HEYA8_OVARY	HEY-A8, Hey-A8, HEY A8, Hey A8	CVCL_8878	Ovarian Serous Adenocarcinoma	Ovary	WT			American Type Culture Collection	RPMI + 10% FBS + 1X Pen/Strep	5000						1000X FGF	0.1	Shenandoah/Thermo Fisher Scientific
JEG3	JEG3_PLACENTA	JEG-3, Jeg-3, Jeg3, jeg3	CVCL_0363	Choriocarcinoma	Placenta	WT		Over-expressed	American Type Culture Collection	EMEM + 10% FBS + 1X Pen/Strep + 2mM glutamine	5000						1000X LIF	0.1	Millipore/Sigma
JMURTK2	JMURTK2_SOFT_TISSUE	JMU-RTK-2	CVCL_4W58	MRT	Kidney	WT			JCRB Cell Bank	DMEM + 10% FBS + 1X Pen/Strep	2500						1000X Heparin	0.1	Sigma-Aldrich
KD	KD_SOFT_TISSUE	KD	CVCL_U757	MRT	Soft Tissue	WT			Franck Bourdeaut, Institut Curie	RPMI + 10% FBS + 1X Pen/Strep	7500
KPMRTRY	KPMRTRY_SOFT_TISSUE	KP-MRT-RY, RY	CVCL_7051	MRT	Kidney	WT			Yasumichi Kuwahara, Kyoto Prefectural University of Medicine	RPMI + 10% FBS + 1X Pen/Strep	10000
KYM1	KYM1_SOFT_TISSUE	KYM-1	CVCL_3007	MRT	Soft Tissue	WT			CCLE/Broad Biological Samples Platform	50:50 DMEM:F12 + 10% FBS + 1X Pen/Strep	5000	Previously characterized as rhabdomyosarcoma
MON	MON_SOFT_TISSUE	MON	CVCL_M846	MRT	Soft Tissue	WT			Franck Bourdeaut, Institut Curie	RPMI + 10% FBS + 1X Pen/Strep	2500
NCIH2004RT	NCIH2004RT_SOFT_TISSUE	NCI-H2004-RT; 2004	N/A	MRT	Kidney	WT			Bernard Weissman, UNC	RPMI + 10% FBS + 1X Pen/Strep	10000
SAOS2	SAOS2_BONE	Saos-2, SAOS-2, SAOS 2, Saos 2, Saos2, SaOs2, Sarcoma Osteogenic-2, SaOS, SAOS	CVCL_0548	Osteosarcoma	Bone	Null			American Type Culture Collection	McCoy's + 10% FBS + 1X Pen/Strep + 2mM glutamine	2500
SJSAX	N/A	SJSA-X	CVCL_0548	Osteosarcoma	Bone	WT	Amplified	Over-expressed	Geoffrey Wahl, Salk Institute	DMEM + 10% FBS + 1X Pen/Strep + 2mM glutamine	2500	This is the SJSA1 cell line engineered to also over-express MDM4 (MDMX)
SJSA1	SJSA1_BONE	SJSA-1, SJSA	CVCL_1697	Osteosarcoma	Bone	WT	Amplified		American Type Culture Collection	RPMI + 10% FBS + 1X Pen/Strep	2500
STM9101	STM9101_SOFT_TISSUE	STM91-01; STM-91-01	CVCL_8000	MRT	Kidney	WT			Tim Triche, UCLA	RPMI + 10% FBS + 1X Pen/Strep + 2mM glutamine	10000
SW480	SW480_LARGE_INTESTINE	SW-480, SW 480	CVCL_0546	Colorectal adenocarcinoma	Colon	Mutant			American Type Culture Collection	RPMI + 10% FBS + 1X Pen/Strep	5000
TM87	TM87_SOFT_TISSUE	TM-87; TM87-16	CVCL_8001	MRT	Soft Tissue	WT			Bernard Weissman, UNC	McCoy's + 10% FBS + 1X Pen/Strep	5000
TTC1240	TTC1240_SOFT_TISSUE	TTC-1240, TTC 1240	CVCL_8002	MRT	Kidney	WT			Tim Triche, UCLA	RPMI + 10% FBS + 1X Pen/Strep	10000
TTC549	TTC549_SOFT_TISSUE	TTC549	CVCL_8005	MRT	Liver	WT			Tim Triche, UCLA	RPMI + 10% FBS + 1X Pen/Strep	7500
TTC642	TTC642_SOFT_TISSUE	TTC642	CVCL_8006	MRT	Soft Tissue	WT			Tim Triche, UCLA	RPMI + 10% FBS + 1X Pen/Strep	2500
TTC709	TTC709_SOFT_TISSUE	TTC-709	CVCL_8007	MRT	Soft Tissue	WT			Tim Triche, UCLA	RPMI + 10% FBS + 1X Pen/Strep	5000
U2OS	U2OS_BONE	U-2 OS, U-2OS, U2-OS, U20-S, U20S	CVCL_0042	Osteosarcoma	Bone	WT			American Type Culture Collection	McCoy's + 10% FBS + 1X Pen/Strep + 2mM glutamine	2500

## Sheet: S Table 2- p53 status
Parameter	Database
Cell Line Name	CCLE	1321N1_CENTRAL_NERVOUS_SYSTEM	143B_BONE	22RV1_PROSTATE	2313287_STOMACH	42MGBA_CENTRAL_NERVOUS_SYSTEM	5637_URINARY_TRACT	59M_OVARY	639V_URINARY_TRACT	647V_URINARY_TRACT	697_HAEMATOPOIETIC_AND_LYMPHOID_TISSUE	769P_KIDNEY	786O_KIDNEY	8305C_THYROID	8505C_THYROID	8MGBA_CENTRAL_NERVOUS_SYSTEM	A101D_SKIN	A172_CENTRAL_NERVOUS_SYSTEM	A204_SOFT_TISSUE	A2058_SKIN	A253_SALIVARY_GLAND	A2780_OVARY	A375_SKIN	A3KAW_HAEMATOPOIETIC_AND_LYMPHOID_TISSUE	A498_KIDNEY	A4FUK_HAEMATOPOIETIC_AND_LYMPHOID_TISSUE	A549_LUNG	A673_BONE	A704_KIDNEY	ABC1_LUNG	ACCMESO1_PLEURA	ACHN_KIDNEY	AGS_STOMACH	ALEXANDERCELLS_LIVER	ALLSIL_HAEMATOPOIETIC_AND_LYMPHOID_TISSUE	AM38_CENTRAL_NERVOUS_SYSTEM	AML193_HAEMATOPOIETIC_AND_LYMPHOID_TISSUE	AMO1_HAEMATOPOIETIC_AND_LYMPHOID_TISSUE	AN3CA_ENDOMETRIUM	ASPC1_PANCREAS	AU565_BREAST	AZ521_STOMACH	BC3C_URINARY_TRACT	BCP1_HAEMATOPOIETIC_AND_LYMPHOID_TISSUE	BCPAP_THYROID	BDCM_HAEMATOPOIETIC_AND_LYMPHOID_TISSUE	BECKER_CENTRAL_NERVOUS_SYSTEM	BEN_LUNG	BFTC905_URINARY_TRACT
Genetic and Functional p53 Status	All Databases	Wild-type and Functional	Wild-type but Non-functional	Mutant but Functional	Wild-type and Functional	Mutant and Non-functional	Mutant and Non-functional	Mutant and Non-functional	Mutant and Non-functional	Mutant and Non-functional	Wild-type but Non-functional	Wild-type and Functional	Mutant but Functional	Mutant and Non-functional	Mutant and Non-functional	Mutant and Non-functional	Wild-type and Functional	Wild-type and Functional	Wild-type and Functional	Mutant and Non-functional	Mutant and Non-functional	Wild-type and Functional	Wild-type and Functional	Wild-type and Functional	Wild-type and Functional	Mutant and Non-functional	Wild-type and Functional	Mutant and Non-functional	Mutant but Functional	Mutant and Non-functional	Wild-type and Functional	Wild-type and Functional	Wild-type and Functional	Mutant and Non-functional	Wild-type but Non-functional	Wild-type and Functional	Mutant and Non-functional	Wild-type and Functional	Mutant but Functional	Mutant and Non-functional	Mutant and Non-functional	Wild-type and Functional	Wild-type and Functional	Mutant but Functional	Mutant and Non-functional	Wild-type and Functional	Mutant and Non-functional	Mutant and Non-functional	Mutant but Functional
TP53 Mutation Type	All Databases	WT/High Functional Score (Z>0)	WT/Low Functional Score (Z<0)	Missense Mutation	WT/High Functional Score (Z>0)	Missense Mutation	Missense Mutation	Frame Shift Del	Missense Mutation	Missense Mutation	WT/Low Functional Score (Z<0)	WT/High Functional Score (Z>0)	Missense Mutation	Missense Mutation	Missense Mutation	Missense Mutation	WT/High Functional Score (Z>0)	WT/High Functional Score (Z>0)	WT/High Functional Score (Z>0)	Missense Mutation	Frame Shift Del	WT/High Functional Score (Z>0)	WT/High Functional Score (Z>0)	WT/High Functional Score (Z>0)	WT/High Functional Score (Z>0)	Missense Mutation	WT/High Functional Score (Z>0)	Frame Shift Mutation	Missense Mutation	Missense Mutation	WT/High Functional Score (Z>0)	WT/High Functional Score (Z>0)	WT/High Functional Score (Z>0)	Missense Mutation	WT/Low Functional Score (Z<0)	WT/High Functional Score (Z>0)	Splice Site Mutation	WT/High Functional Score (Z>0)	Missense Mutation	Frame Shift Del	Missense Mutation	WT/High Functional Score (Z>0)	WT/High Functional Score (Z>0)	Missense Mutation	Missense Mutation	WT/High Functional Score (Z>0)	Splice Site Mutation	Missense Mutation	Splice Site Mutation
TP53 Mutation	TCGA			Q331R		T211I, R282Q	R280T	H193Kfs49	R248Q	E336*, I162N			R248W	R273C	R248G	R273C				V274F	E180Gfs67					R249G				P278S				R249S			X331_splice		R213Q, S90Pfs33	C135Afs35	R175H			D259N	D259Y		X126_splice	Y163C	X225_splice
TP53 Mutation	CCLE			Q331R		R282Q, T211I	R280T	H193fs	R248Q	E336*, I162N			R248W	R273C	R248G	R273C				V274F	E180fs					R249G				P278S				R249S			Q331_splice		P89fs, R213Q		R175H			D259N	D259Y		Y126_splice	Y163C	V225_splice
TP53 Mutation	Sanger			Q331R, V73fs50		R282Q, T211I				I162N						R273C				V274F	E180fs67					R249G		A119fs*5	C135R, Y126D	P278S									S90fs33		R175H				D259Y			Y163C
TP53 Log2 Copy Number	CCLE	-0.1952	0.3817	-0.0024	0.0173	-0.2685	-0.6005	-0.2541	0.1944	0.0582	0.0784	0.0593	-0.2024	-0.0952	0.1038	-0.1094	0.0235	0.1471	0.0128	0.2326	0.3259	-0.0129	0.1286	-0.0013	0.3039	-0.0018	0.482	-0.0181	-0.0753	0.0722	0.1024	0.4366	-0.0392	-0.3256	-0.9714	-0.1517	-1.058	0.227	-0.0661	-0.2444	-0.2381	0.0179	0.0035	-0.0303	-0.0746	0.0167	-0.0074	-0.2514	-0.4172
TP53 mRNA Expression Z-score	CCLE	0.352367	0.421528	0.565672	0.770201	-0.858414	0.172582	-2.3226	1.48905	1.2505	1.42724	-0.22783	-1.58961	0.78875	0.608245	0.647523	-0.119782	0.899818	0.457821	1.26111	0.0181565	-0.245362	0.344127	0.61577	0.773344	1.24675	0.0195459	-0.774802	-0.249859	0.786967	-0.540791	0.0230464	0.102181	-1.74166	-1.01505	-0.9144	-0.0527237	1.16741	-0.240822	-1.68661	-0.30233	-0.0085861	1.03482	0.174835	1.06669	0.759293	0.365138	-0.629182	-2.28215
p53 Target Genes Functional Score Z-score (Jeay et al.)	CCLE	0.0570685	-0.430458	0.013572	0.894967	-0.183134	-0.536074	-0.359404	-0.158653	-0.181474	-0.00194572	0.902438	0.00963715	-0.374385	-0.438043	-0.263896	0.904713	0.230896	0.766208	-0.377793	-0.286617	0.303547	0.641795	0.246054	0.798813	-0.177846	0.662132	-0.099837	0.975493	-0.274414	0.0988616	1.07718	1.20986	-0.535684	-0.719272	1.41023	-0.359263	1.27843	0.0932454	-0.299219	-0.884378	0.752299	0.0829352	1.01656	-0.328099	1.27238	-0.388853	-0.955887	0.292569
MDM2 mRNA Expression Z-score	CCLE	-0.249885	-0.959009	-0.270159	1.41458	0.93662	-0.845619	-1.47009	-0.218659	-0.161239	3.44128	0.916398	-0.695069	-1.32177	-0.745422	-1.06368	1.23775	-0.554234	0.503882	-0.725292	-0.783403	0.695366	0.568725	1.57478	0.39806	0.443766	0.434222	-0.398489	1.55114	0.660074	-0.889708	1.86038	1.73793	-0.816447	-0.594761	1.4239	-0.865987	3.49527	0.0179039	-0.655321	-0.0735345	-0.0191635	0.294946	3.83402	-1.36475	1.87068	-1.40597	-0.802501	1.00075
CDKN1A mRNA Expression Z-score	CCLE	-0.132464	-0.567187	-0.0307449	0.574342	-0.617064	0.976601	-0.693978	-0.82901	0.297834	-0.238838	1.34808	0.189512	-0.7798	-0.541742	-0.0232774	1.14765	0.895525	0.3374	-0.791437	-0.471533	-0.261382	0.611235	-0.60593	0.973995	-0.0536617	0.778877	-0.55614	0.587717	-0.362834	-0.0293067	1.03179	1.14067	-1.27758	-2.03733	0.447593	-0.900779	1.05464	-0.92591	0.117006	-1.19288	0.584888	0.0848358	0.949655	-1.0558	1.12458	-0.790103	-0.334366	0.833989
ZMAT3 mRNA Expression Z-score	CCLE	0.0600283	-0.274763	-1.11195	0.374738	0.100291	-2.59936	-0.076216	0.131108	-0.443944	0.0635449	0.941771	-0.117441	-0.343999	-0.348404	0.0465297	0.838466	0.808645	-0.0255634	0.163942	-0.491541	-0.265601	-0.0421642	-0.609902	0.255576	-1.87221	-0.456579	-0.972702	0.245256	1.4196	-0.394464	1.05692	1.1815	-1.12821	-0.350897	1.53965	-0.671881	0.734346	-0.778153	-1.39246	-0.437729	0.645066	-0.883978	-0.293571	-0.582294	1.70999	-0.52536	-0.134515	-0.0272728
DDB2 mRNA Expression Z-score	CCLE	1.20768	-1.2136	-0.141147	1.3331	-0.238521	0.591723	-1.43395	-0.681772	0.413247	-0.025181	1.15264	0.0842914	-0.412901	0.488097	-1.49114	0.872427	1.28115	1.42627	-1.43949	0.350975	0.0685767	1.35143	0.297087	1.49795	0.100068	1.38273	1.75219	0.875059	-2.18355	0.231718	0.802823	1.14841	-0.708671	0.240021	2.31951	0.242236	1.03943	0.0406993	-0.57981	-2.4338	0.679946	0.305084	1.39937	-0.824676	1.82458	0.813719	-1.06184	0.429048
FDXR mRNA Expression Z-score	CCLE	0.686473	-0.249191	0.00845709	2.01033	-0.895654	0.635441	-1.03509	-0.184571	-0.0047612	-0.86993	0.558692	-0.309179	-1.25273	-1.03027	-0.739334	0.455236	0.0270858	1.44165	-0.737276	-0.0420088	0.588931	0.523407	0.802721	1.41085	0.233571	1.60067	0.63543	0.446811	-0.528017	-1.00422	2.15071	0.955503	-1.3125	0.465303	1.81037	0.27943	0.36052	0.157996	-0.865657	0.413629	1.38587	0.90432	1.89585	-0.338106	2.17625	-0.172631	-0.601986	0.304477
RPS27L mRNA Expression Z-score	CCLE	0.756189	-0.326591	0.490937	1.08077	0.404616	-0.986111	0.904557	-1.56259	-0.0643502	-0.123494	1.33786	0.535857	0.770159	-0.262295	0.598146	1.32564	0.548327	1.12724	-0.460033	-1.76573	0.523315	1.26061	-0.0106127	1.14677	-0.263637	1.8744	-0.552595	2.55896	-0.698617	1.80928	0.968635	1.71929	0.159876	-1.35254	1.81195	-0.115814	0.8361	-0.0573593	0.0897746	-1.10053	0.655173	-0.0513482	0.760797	0.347794	1.07055	0.0854084	-0.867763	-1.75944
BAX mRNA Expression Z-score	CCLE	-0.066607	-0.0284428	-0.256562	0.904225	0.913797	0.42421	-0.993049	0.334445	0.466401	-0.0988332	1.25096	1.10302	0.488893	-0.576823	-0.0482548	1.26552	-1.03587	0.622061	-0.187035	0.00390285	0.739719	2.04527	1.15332	0.388311	0.686932	0.597775	0.31735	-0.846755	-0.270538	-0.659955	-0.0437339	2.64333	-1.38684	-1.02696	2.03311	0.366148	1.40667	1.77767	-0.473613	-1.03465	1.19111	-0.124067	0.932745	-0.152678	1.10675	-0.850159	-0.481305	-0.821107
RRM2B mRNA Expression Z-score	CCLE	-0.370842	-1.12271	0.855578	1.06664	-1.09309	-3.0165	0.531872	0.495647	-0.651344	0.557529	0.505787	0.411162	-0.178228	-0.198873	0.64267	0.608416	0.573488	0.474421	0.235517	0.362706	-0.201757	-0.119768	-0.455861	1.32435	-0.506795	0.554669	-1.1982	1.9294	0.164406	1.27143	0.969039	0.515024	0.625547	0.814551	2.17853	-0.159925	0.905089	-0.293471	0.418329	-1.27395	0.741308	0.669647	0.211531	-0.642768	1.33282	-0.0841033	-0.538725	0.436186
SESN1 mRNA Expression Z-score	CCLE	-0.605004	-0.795633	0.0234297	1.12047	-0.825335	-1.21731	-0.734857	0.16305	-0.952427	-0.315444	-0.408044	-0.897295	-1.019	-1.0305	-0.516403	0.789365	-0.240784	0.787491	-0.561073	-0.498958	0.0251068	0.0177117	-0.361552	0.264179	-0.708094	-0.372672	-1.23027	0.792362	-0.33218	-0.427259	0.732082	1.14137	-0.178204	0.0692197	1.29448	1.18299	1.87893	0.265463	-0.482628	-0.122404	1.19672	0.475348	0.180331	0.0900091	0.0883464	-0.760231	-0.461415	0.696033
CCNG1 mRNA Expression Z-score	CCLE	-0.604693	0.322125	0.548171	-1.4437	-0.873523	-0.507978	1.01385	0.551787	-1.19467	0.412914	1.12761	-0.508879	-0.104556	-0.854703	-0.414748	0.471113	-0.742169	1.23961	-0.0742884	-0.324951	0.795832	0.604269	0.918664	0.456416	0.427585	-0.065896	0.429856	1.79949	-0.633511	0.774596	1.44417	0.608093	-0.178299	-0.906297	0.219302	-1.50192	1.62404	0.500088	-0.693237	-1.34147	0.452449	-1.26695	0.997014	0.592587	1.23857	-1.14833	-2.61666	1.33648
TNFRSF10B mRNA Expression Z-score	CCLE	-0.0531177	0.479958	0.0332815	1.40914	0.17339	0.648084	0.0334935	0.0553778	0.29904	-2.82495	1.19507	0.310024	0.0356946	0.282455	0.106631	0.940266	0.978687	0.493829	0.420736	0.507761	0.630906	0.239021	0.00388485	0.67049	-0.443832	0.955257	0.675365	0.790988	-0.253391	0.405368	0.876132	0.517355	0.308796	-3.2323	0.43414	-1.80639	0.727723	0.320775	1.22621	-1.13084	0.761922	0.504449	0.31439	0.321601	0.453102	0.560377	-2.61368	0.789114
p53 Target Genes Z-score (Jeay et al.)	CCLE	0.0570685	-0.430458	0.013572	0.894967	-0.183134	-0.536074	-0.359404	-0.158653	-0.181474	-0.00194572	0.902438	0.00963715	-0.374385	-0.438043	-0.263896	0.904713	0.230896	0.766208	-0.377793	-0.286617	0.303547	0.641795	0.246054	0.798813	-0.177846	0.662132	-0.099837	0.975493	-0.274414	0.0988616	1.07718	1.20986	-0.535684	-0.719272	1.41023	-0.359263	1.27843	0.0932454	-0.299219	-0.884378	0.752299	0.0829352	1.01656	-0.328099	1.27238	-0.388853	-0.955887	0.292569
[truncated: 918 more columns]

## Sheet: S Table 3- sgRNA
Oligo Name	Oligo Sequence	sgRNA sequence	Target	Annealed to	Plasmid name	Addgene plasmid #
p53-sgRNA-1F	CACCGACCATTGTTCAATATCGTCC	ACCATTGTTCAATATCGTCC	TP53	p53-sgRNA-1R	pX330-TP53-1	121917
p53-sgRNA-1R	AAACGGACGATATTGAACAATGGTC	ACCATTGTTCAATATCGTCC	TP53	p53-sgRNA-1F	pX330-TP53-1	121917
p53-sgRNA-2F	CACCGGGAGAGGAGCTGGTGTTGT	GGAGAGGAGCTGGTGTTGT	TP53	p53-sgRNA-2R	pX330-TP53-2	121918
p53-sgRNA-2R	AAACACAACACCAGCTCCTCTCCC	GGAGAGGAGCTGGTGTTGT	TP53	p53-sgRNA-2F	pX330-TP53-2	121918

## Sheet: S Table 4- primers
TP53 allele screening and sequencing primers
Name	Sequence	Target	Pair 1	Purpose 1- deletion	Pair 2	Purpose 2- single cut sites	Pair 3	Purpose 3- inversions
TP53-1	GAGACCTGTGGGAAGCGAAA	TP53	TP53-2	Screen/Sequence deletion of DNA binding domain	TP53-3	Sequence pX330-TP53-1 cut site	TP53-4	Sequence inversion of DNA binding domain
TP53-2	TCTTTGAGGCATCACTGCCC	TP53	TP53-1	Screen/Sequence deletion of DNA binding domain	TP53-4	Sequence pX330-TP53-2 cut site	TP53-3	Sequence inversion of DNA binding domain
TP53-3	AGGAGAGATGCTGAGGGTGT	TP53			TP53-1	Sequence pX330-TP53-1 cut site	TP53-2	Sequence inversion of DNA binding domain
TP53-4	AGGGAGCACTAAGCGAGGTA	TP53			TP53-2	Sequence pX330-TP53-2 cut site	TP53-1	Sequence inversion of DNA binding domain
RT-qPCR primers
Name	Sequence	Target	Pair	Notes
GAPDH-1	GAGTCAACGGATTTGGTCGT	GAPDH	GAPDH-2	Internal RT-qPCR control
GAPDH-2	TTGATTTTGGAGGGATCTCG	GAPDH	GAPDH-1	Internal RT-qPCR control
TP53-5	ACCTATGGAAACTACTTCCTGAAA	TP53	TP53-6
TP53-6	CTGGCATTCTGGGAGCTTCA	TP53	TP53-5
CDKN1A-1	AGTCAGTTCCTTGTGGAGCC	CDKN1A	CDKN1A-2
CDKN1A-2	GCATGGGTTCTGACGGACAT	CDKN1A	CDKN1A-1
MDM2-1	GGTGCTGTAACCACCTCACA	MDM2	MDM2-2
MDM2-2	TTTTGTGCACCAACAGACTTT	MDM2	MDM2-1
BBC3-1	CTCGGTGCTCCTTCACTCTG	BBC3	BBC3-2
BBC3-2	AGGCTAGTGGTCACGTTTGG	BBC3	BBC3-1
TP53I3-1	ACATCAATGGGCCCCTGTTT	TP53I3	TP53I3-2
TP53I3-2	AGGCAGAATTTGCTCCGTGA	TP53I3	TP53I3-1

## Sheet: S Table 5- antibodies
Target	Antibody Name	Company	Product Number	Dilution	Secondary	RRID
p53	p53 (DO-1) sc-126	Santa Cruz Biotechnology	C1815	1 to 1000	Mouse (680)	AB_628082
p21	p21 Waf1/Cip1 (12D1) Rabbit mAb	Cell Signaling Technology	2947S	1 to 1000	Rabbit (800)	AB_823586
MDM2	MDM2 (D1V2Z) Rabbit mAb	Cell Signaling Technology	86934S	1 to 1000	Rabbit (800)	N/A
β-actin	beta-Actin (D6A8) Rabbit mAb	Cell Signaling Technology	8457L	1 to 1000	Rabbit (800)	AB_10950489
Cleaved caspase-3	Cleaved Caspase-3 (D175) Rabbit Ab	Cell Signaling Technology	9661S	1 to 1000	Rabbit (800)	AB_2341188
SMARCB1	Rabbit anti-SMARCB1/SNF5 affinity purified	Bethyl Laboratories	A301-087A	1 to 5000	Rabbit (800)	AB_2191714
Ki-67	Ki-67 (R)	Biocare Medical	CRM325	1 to 100	Rabbit (IHC)	AB_2721189
p16	p16/INK4a Rabbit mAb	Epitomics	1963-1	1 to 2000	Rabbit (800)	AB_562175)
HSP90	HSP90 Rabbit Ab	Cell Signaling Technology	4874S	1 to 1000	Rabbit (800)	AB_2121214)

## Sheet: S Table 6- p53 target DE
Transcript	baseMean	log2FoldChange	lfcSE	stat	pvalue	padj	DMSO_rep1	DMSO_rep2	DMSO_rep3	Idasanutlin_rep1	Idasanutlin_rep2
TP53I3	17182.3	5.33482	0.176744	30.1839	3.85102e-200	1.92204e-196	1177.02	898.08	1002.89	45142.1	37691.7
RRAD	2125.12	8.6812	0.289376	29.9997	9.90443e-198	3.95464e-194	10.6038	15.9046	12.4049	5703.88	4882.8
BTG2	4741.25	3.77129	0.126043	29.9207	1.05764e-196	3.51913e-193	811.669	776.145	758.605	10869.8	10490.1
MDM2	28144.8	4.2678	0.153512	27.8011	4.2027e-170	1.04878e-166	3659.26	2929.63	3576.42	65187.7	65370.9
FDXR	8480.41	3.25633	0.135541	24.0247	1.5337e-127	1.91367e-124	1982.9	1797.22	1972.37	19343.6	17306
CES2	5984.38	2.6764	0.124302	21.5314	7.90322e-103	5.635e-100	1843.13	1978.53	1865.5	11762.5	12472.2
EPS8L2	7923	3.55667	0.169311	21.0068	5.6886e-98	3.66346e-95	1496.09	1338.11	1644.12	19385.1	15751.6
MAST4	698.99	8.03542	0.408569	19.6672	4.11776e-86	1.95731e-83	7.71182	9.54276	2.86266	1428.63	2046.2
TRAF4	4843.79	2.42634	0.124727	19.4532	2.73641e-84	1.21399e-81	1806.49	1676.35	1800.61	9661.66	9273.84
CYFIP2	6601.04	4.10963	0.220294	18.6552	1.14466e-77	4.57041e-75	690.208	1122.87	826.355	15035.3	15330.5
SULF2	4239.87	5.89636	0.321652	18.3315	4.64033e-75	1.65428e-72	142.669	268.258	110.69	10389.3	10288.5
ZNF219	2324.98	2.77927	0.153563	18.0986	3.26992e-73	1.10645e-70	697.92	675.416	710.894	5212.76	4327.92
FAM212B	330.622	5.85853	0.324201	18.0707	5.4244e-73	1.80488e-70	14.4597	15.9046	11.4506	703.131	908.165
PLK3	2206.47	2.38733	0.132399	18.0314	1.10521e-72	3.55877e-70	859.868	799.471	798.682	4367.93	4206.39
DRAM1	3226.88	2.51523	0.140258	17.9329	6.52998e-72	2.03695e-69	1099.9	1060.31	1192.78	6710.64	6070.77
PANK1	1137.19	2.75307	0.154834	17.7808	9.95175e-71	2.87937e-68	327.752	377.469	330.16	2324.59	2326
ZNF561	4696.49	2.20981	0.125652	17.5867	3.11705e-69	8.76461e-67	1920.24	1990.2	1839.74	8601.64	9130.64
SESN1	1713.15	2.6851	0.164433	16.3294	6.09432e-60	1.39847e-57	585.135	465.475	568.715	3456	3490.41
VWCE	959.979	3.43535	0.216013	15.9035	5.99265e-57	1.23337e-54	198.579	182.373	203.249	2482.27	1733.43
PRKAB1	1988.57	2.04949	0.129045	15.882	8.44397e-57	1.72016e-54	904.211	886.417	854.027	3622.19	3676
EPHA2	8482.06	2.54698	0.162521	15.6717	2.3621e-55	4.57835e-53	3345	2640.16	2676.59	16604.5	17144
RAP2B	2573.1	1.92462	0.124193	15.497	3.63453e-54	6.53692e-52	1204.97	1217.23	1221.4	4713.11	4508.8
CDKN1A	45443.4	3.21732	0.211729	15.1955	3.79038e-52	6.35892e-50	12270.5	7907.77	11377.2	101055	94606.5
APOBEC3C	1515.2	3.8992	0.257002	15.1719	5.43129e-52	8.96118e-50	179.3	317.032	196.569	3535.9	3347.21
POLH	2133.72	2.42551	0.168241	14.4169	4.05177e-47	5.39264e-45	837.697	779.326	711.848	3748.97	4590.76
RRM2B	5257.97	2.2852	0.160427	14.2445	4.85006e-46	6.08973e-44	2039.78	1822.67	2323.53	9630.76	10473.1
HSPA4L	1621.39	2.58321	0.188487	13.705	9.48081e-43	9.80699e-41	502.232	560.902	560.127	2762.45	3721.22
PLK2	226.783	3.56199	0.261327	13.6304	2.64146e-42	2.67686e-40	34.7032	43.4726	49.6195	496.453	509.665
ANXA4	6650.52	1.85345	0.139385	13.2974	2.3964e-40	2.24609e-38	3125.22	3581.72	3047.78	11826.5	11671.4
SPATA18	2083.24	1.92984	0.145162	13.2944	2.4963e-40	2.32879e-38	1010.25	889.597	1042.01	3687.18	3787.16
ANKRA2	1031.5	2.17421	0.164739	13.1979	9.02425e-40	8.22649e-38	398.123	482.44	406.498	1941.07	1929.38
WDR63	138.072	4.86844	0.369589	13.1726	1.26186e-39	1.1399e-37	10.6038	12.7237	10.4964	300.429	356.106
GRHL3	160.751	6.76658	0.513791	13.1699	1.30773e-39	1.17602e-37	3.85591	5.30153	1.90844	418.683	374.006
IKBIP	2517.5	1.93601	0.147223	13.1501	1.6986e-39	1.51388e-37	1239.68	1078.33	1226.17	4749.33	4294
NADSYN1	2974.78	2.39848	0.183617	13.0624	5.40014e-39	4.62697e-37	941.806	1289.33	1063.96	5452.46	6126.35
TRIAP1	2076.84	2.03932	0.160951	12.6705	8.62167e-37	6.72356e-35	977.474	823.858	974.259	4057.92	3550.7
PLCL2	191.36	3.9862	0.321793	12.3874	3.05607e-35	2.23485e-33	23.1355	37.1107	22.9013	385.657	487.998
ZMAT3	4526.74	2.28265	0.18532	12.3173	7.30786e-35	5.22918e-33	1600.2	2128.04	1605.95	8142.47	9157.02
PGF	1218.86	2.75605	0.228833	12.0439	2.08775e-33	1.44721e-31	446.322	317.032	343.519	2882.84	2104.61
ACER2	203.407	3.65456	0.306765	11.9132	1.01007e-32	6.61149e-31	33.7392	41.352	33.3977	369.676	538.87
CSF1	1809.54	1.66864	0.141492	11.7932	4.23141e-32	2.65647e-30	962.05	1015.77	922.731	3224.81	2922.33
FBXO22	4090.39	1.55061	0.133201	11.6412	2.54546e-31	1.52605e-29	2485.13	2268	2172.76	6771.36	6754.72
FBXW7	857.274	1.77944	0.153748	11.5738	5.59723e-31	3.29626e-29	433.79	411.399	458.026	1445.68	1537.47
IER5	2295.25	1.4325	0.126496	11.3245	9.92763e-30	5.59873e-28	1416.08	1355.07	1328.27	3707.42	3669.4
CMBL	4362.86	2.74712	0.245397	11.1946	4.33324e-29	2.31927e-27	1202.08	1763.29	1019.11	9501.86	8327.99
NINJ1	2601.03	1.8697	0.170212	10.9846	4.53404e-28	2.32096e-26	1288.84	1122.87	1372.17	5049.76	4171.53
XPC	4640.02	1.32258	0.120935	10.9363	7.72732e-28	3.90552e-26	2985.44	2821.48	2890.33	7421.23	7081.62
PHLDA3	5340.38	1.77816	0.164472	10.8113	3.04367e-27	1.48567e-25	2510.2	3101.4	2513.42	9835.31	8741.56
SAC3D1	1848.83	1.9623	0.182586	10.7473	6.10353e-27	2.95039e-25	929.275	803.713	835.897	3791.58	2883.71
BBC3	3553.24	1.5187	0.141803	10.71	9.1394e-27	4.37552e-25	2062.91	1899.01	2142.22	6180.1	5481.96
ENC1	111.682	4.89192	0.457725	10.6875	1.16502e-26	5.49844e-25	10.6038	11.6634	4.7711	212.005	319.365
TP53INP1	2715.28	2.31199	0.223801	10.3305	5.12675e-25	2.28461e-23	1028.56	802.652	1317.78	5214.89	5212.53
FAM210B	2369.43	2.22719	0.216929	10.2669	9.93493e-25	4.36874e-23	811.669	1217.23	846.393	4269.92	4701.92
TMEM68	938.354	1.5753	0.154161	10.2185	1.63807e-24	7.03278e-23	508.016	566.204	497.149	1524.52	1595.88
FAS	993.723	2.0678	0.202805	10.196	2.06623e-24	8.85198e-23	491.629	345.66	471.385	1790.85	1869.09
DDB2	2963.96	1.84083	0.182779	10.0714	7.39414e-24	3.10119e-22	1710.1	1319.02	1344.5	5637.83	4808.38
KITLG	2071.18	1.7435	0.175505	9.93417	2.95635e-23	1.19234e-21	1167.38	892.778	1143.16	3479.43	3673.17
HHAT	212.711	2.95801	0.309094	9.56995	1.06959e-21	3.90369e-20	50.1268	79.523	42.9399	453.839	437.125
ASTN2	766.559	2.16546	0.234301	9.24221	2.41454e-20	8.03398e-19	290.157	411.399	259.548	1410.52	1461.17
ASCC3	5162.13	1.48854	0.169132	8.80106	1.35535e-18	4.09353e-17	3242.82	2659.25	3088.81	7554.4	9265.36
CDIP1	3075.22	1.56205	0.177495	8.8005	1.36203e-18	4.10748e-17	1906.75	1481.25	1791.07	5544.08	4652.93
RPS27L	3687.54	1.3149	0.14998	8.76714	1.83258e-18	5.45239e-17	2456.22	2216.04	2262.46	6254.67	5248.33
TM7SF3	2440.53	1.15629	0.131901	8.76629	1.84645e-18	5.4855e-17	1551.04	1728.3	1629.81	3606.21	3687.3
TNFRSF10D	2688.8	1.32199	0.152872	8.64768	5.25555e-18	1.49888e-16	1488.38	1811	1742.41	4085.62	4316.61
NTPCR	1487.33	1.31401	0.153236	8.57511	9.899e-18	2.75626e-16	855.048	1029.56	914.143	2328.86	2309.04
RNF19B	1981.92	1.83323	0.216696	8.45994	2.67506e-17	7.15884e-16	1108.57	734.793	1091.63	3601.95	3372.65
SLC12A4	4056.29	1.36852	0.163889	8.35028	6.8104e-17	1.76988e-15	2856.27	2392.05	2204.25	6445.37	6383.54
FAM13C	207.906	2.11586	0.255947	8.2668	1.37606e-16	3.522e-15	94.4698	73.1612	99.2389	416.552	356.106
ZNF79	638.002	1.77857	0.217543	8.17573	2.94089e-16	7.41313e-15	369.204	252.353	348.29	1145.25	1074.91
ABCA12	51.6906	5.56797	0.687375	8.10034	5.48072e-16	1.35417e-14	3.85591	2.12061	1.90844	154.476	96.0922
CCNG1	5815.79	1.07551	0.136542	7.87676	3.35986e-15	7.90061e-14	4211.62	3662.3	4216.7	8563.28	8425.02
CCDC90B	2952.57	1.15562	0.149506	7.72963	1.07862e-14	2.42769e-13	2001.22	1778.13	2160.35	4523.48	4299.65
SERPINB5	81.8019	9.16483	1.23503	7.42073	1.16477e-13	2.41971e-12	0.963978	0	0	229.05	178.995
ZNF337	1279.96	1.19236	0.162155	7.35318	1.93552e-13	3.92291e-12	761.542	945.794	829.218	1911.24	1951.99
FAM198B	2258.39	1.69946	0.240382	7.06982	1.55136e-12	2.83361e-11	1463.32	872.633	1230.94	4233.7	3491.35
TRIM22	37.872	4.92746	0.707165	6.96791	3.21679e-12	5.7237e-11	5.78387	2.12061	0.95422	86.2933	94.208
PTP4A1	9919.51	0.989823	0.145708	6.79321	1.09669e-11	1.86335e-10	7461.19	6293.98	7586.05	14285.3	13971
ISCU	4714.02	1.23027	0.183415	6.70761	1.97838e-11	3.29137e-10	3057.74	2625.32	3508.67	7851.63	6526.73
BLOC1S2	1891.1	1.24993	0.186901	6.68769	2.26728e-11	3.74392e-10	1385.24	1003.05	1268.16	3017.07	2781.96
FOSL1	2566.94	1.70767	0.258861	6.59684	4.20017e-11	6.71354e-10	1739.98	924.588	1374.08	4436.12	4359.95
CERS5	3609.73	1.06772	0.170165	6.27461	3.50503e-10	5.02329e-09	2821.56	2279.66	2426.58	5745.43	4775.4
MICALL1	7235.95	1.36216	0.217933	6.25038	4.09447e-10	5.81794e-09	5131.25	3330.42	4869.39	12216.4	10632.3
AEN	3315.34	0.976694	0.159184	6.13564	8.48187e-10	1.16379e-08	2679.86	2098.35	2391.28	4726.96	4680.25
PPM1D	1467.29	1.10069	0.181228	6.07351	1.25144e-09	1.67676e-08	1160.63	865.21	993.343	2065.71	2251.57
EDA2R	1730.32	1.34326	0.238893	5.62283	1.87859e-08	2.14554e-07	1231.96	762.361	1219.49	2842.35	2595.43
ARHGEF3	390.377	0.962311	0.179494	5.36124	8.26516e-08	8.69824e-07	266.058	285.223	297.717	559.309	543.58
CD82	2439.79	4.42329	0.838215	5.27704	1.31289e-07	1.34966e-06	158.092	523.792	115.461	5321.42	6080.19
DUSP14	1284.01	1.19364	0.227539	5.24587	1.55543e-07	1.58278e-06	981.329	722.069	838.76	2290.5	1587.41
BAX	4674.5	0.977308	0.186578	5.23806	1.62274e-07	1.64699e-06	3710.35	2992.19	3403.7	7562.92	5703.35
GDF15	27121.3	1.73148	0.345114	5.01713	5.2449e-07	4.8874e-06	18594.2	7131.62	16468.9	49973.4	43438.4
ORAI3	1609.07	1.06379	0.213818	4.97521	6.51778e-07	5.97433e-06	1153.88	1045.46	1161.29	2823.18	1861.55
DYRK3	1371.89	1.09185	0.245902	4.44017	8.98874e-06	6.76409e-05	1071.94	670.114	1090.67	2167.99	1858.72
PSTPIP2	830.789	1.22966	0.277927	4.42442	9.67037e-06	7.2361e-05	466.565	733.732	420.811	1103.7	1429.14
FUCA1	455.237	0.950011	0.223834	4.24427	2.19309e-05	0.000153087	371.131	287.343	335.886	729.765	552.059
PMAIP1	82.8274	1.96833	0.484612	4.06167	4.87239e-05	0.000317573	35.6672	59.3772	20.0386	125.711	173.343
SLC30A1	3516.57	0.82666	0.214215	3.85903	0.000113839	0.000683923	2896.75	2030.49	3128.89	4953.88	4572.86
SERTAD1	1787.91	0.96692	0.252644	3.82721	0.000129604	0.000768921	1107.61	1750.57	1023.88	2535.53	2521.95
DCP1B	926.165	0.578904	0.152305	3.80094	0.000144148	0.000845408	795.282	805.833	719.482	1117.55	1192.67
TNFRSF10B	12562.3	0.840948	0.221947	3.78897	0.000151275	0.000881513	10987.4	7027.71	10610.9	18139.7	16045.5
ATF3	1775.4	-1.25669	0.372852	-3.37048	0.000750386	0.00366187	3170.52	1348.71	2420.86	1278.42	658.514
CPE	87.4864	1.54928	0.463108	3.3454	0.000821644	0.00395451	29.8833	79.523	39.123	143.822	145.08
GADD45A	8603.06	1.07284	0.322686	3.3247	0.000885135	0.00421919	8081.03	3367.53	6456.26	13827.2	11283.3
IGDCC4	1410.36	1.01854	0.332254	3.06554	0.00217281	0.00932658	691.172	1527.9	781.506	1826.01	2225.19
TGFA	14.216	1.82429	0.801677	2.27559	0.0228706	0.0684541	5.78387	11.6634	3.81688	23.4377	26.3782
LIF	11778.8	0.549587	0.289254	1.90002	0.0574307	0.144292	12928.9	6097.83	10780.8	15230.2	13856.1
SYTL1	569.898	0.588009	0.412009	1.42717	0.15353	0.308202	476.205	248.112	698.489	915.136	511.55
TSPAN11	8.78518	0.979749	0.91127	1.07515	0.282309	0.477669	3.85591	8.48246	6.67954	11.7188	13.1891
PRDM1	139.627	0.278091	0.280708	0.990679	0.321842	0.523187	136.885	103.91	145.041	158.737	153.559
PGPEP1	2242.07	0.210017	0.269225	0.78008	0.435344	0.638683	2449.47	1445.2	2434.22	2813.59	2067.87
TLR3	98.5237	0.24131	0.425009	0.567777	0.570187	0.749007	79.0462	107.091	89.6967	66.0517	150.733
SESN2	12942.3	-0.0876092	0.242225	-0.361685	0.717587	0.852632	16360.6	9618.04	13784.7	13863.4	11084.5
LAPTM5	34.3684	0.198549	0.568398	0.349313	0.726854	0.858685	34.7032	23.3268	39.123	51.1368	23.552
GPR87	0.376832	2.37703	4.45346	0.533748	0.593516	NA	0	0	0	0	1.88416
PADI4	1.0407	3.83035	3.33734	1.14772	0.251083	NA	0	0	0	4.2614	0.94208

## Sheet: S Table 7- GSEA
Gene Set	Gene Set Size	Enrichment Score	Normalized Enrichment Score	NOM p-val	FDR q-val	FWER p-val	RANK AT MAX	LEADING EDGE
KEGG_P53_SIGNALING_PATHWAY	68	0.714785	2.44646	0	0	0	4457	tags=57%, list=15%, signal=68%
KEGG_RIBOSOME	87	0.613246	2.13208	0	0	0	9913	tags=89%, list=34%, signal=134%
KEGG_ADHERENS_JUNCTION	73	0.618097	2.12213	0	0	0	5818	tags=53%, list=20%, signal=67%
KEGG_GLYCOSAMINOGLYCAN_BIOSYNTHESIS_KERATAN_SULFATE	15	0.744867	2.0779	0	0	0	2089	tags=53%, list=7%, signal=57%
KEGG_OXIDATIVE_PHOSPHORYLATION	108	0.575916	2.05069	0	0	0	9591	tags=77%, list=33%, signal=115%
KEGG_VASOPRESSIN_REGULATED_WATER_REABSORPTION	39	0.629327	2.03541	0	0	0	5651	tags=46%, list=20%, signal=57%
KEGG_EPITHELIAL_CELL_SIGNALING_IN_HELICOBACTER_PYLORI_INFECTION	65	0.592181	2.01713	0	0	0	7099	tags=60%, list=25%, signal=79%
KEGG_PARKINSONS_DISEASE	106	0.565596	2.00918	0	0	0	9591	tags=75%, list=33%, signal=111%
KEGG_APOPTOSIS	78	0.574921	2.00105	0	0	0	9751	tags=68%, list=34%, signal=102%
KEGG_ALZHEIMERS_DISEASE	147	0.545454	1.96727	0	0	0	9860	tags=70%, list=34%, signal=106%
KEGG_ENDOCYTOSIS	172	0.537362	1.96198	0	0	0	7874	tags=55%, list=27%, signal=75%
KEGG_GLIOMA	62	0.570116	1.94955	0	0	0	7054	tags=50%, list=24%, signal=66%
KEGG_NEUROTROPHIN_SIGNALING_PATHWAY	121	0.537589	1.92967	0	7.78281e-05	0.001	7099	tags=53%, list=25%, signal=70%
KEGG_PANCREATIC_CANCER	68	0.565225	1.92384	0	0.000143697	0.002	7054	tags=49%, list=24%, signal=64%
KEGG_BLADDER_CANCER	41	0.588362	1.91783	0	0.000134118	0.002	6932	tags=49%, list=24%, signal=64%
KEGG_CHRONIC_MYELOID_LEUKEMIA	72	0.557939	1.91503	0	0.000125735	0.002	7054	tags=50%, list=24%, signal=66%
KEGG_GLYCOSAMINOGLYCAN_DEGRADATION	18	0.652031	1.897	0	0.000236678	0.004	7890	tags=72%, list=27%, signal=99%
KEGG_FC_GAMMA_R_MEDIATED_PHAGOCYTOSIS	93	0.539658	1.88919	0	0.000223529	0.004	6074	tags=46%, list=21%, signal=58%
KEGG_SMALL_CELL_LUNG_CANCER	83	0.539331	1.88866	0	0.000211765	0.004	8971	tags=55%, list=31%, signal=80%
KEGG_LYSINE_DEGRADATION	43	0.569288	1.88815	0	0.000201176	0.004	8146	tags=42%, list=28%, signal=58%
KEGG_LYSOSOME	117	0.525865	1.8789	0	0.000191597	0.004	9390	tags=59%, list=32%, signal=87%
KEGG_HUNTINGTONS_DISEASE	166	0.516147	1.87555	0	0.000182888	0.004	8844	tags=57%, list=31%, signal=81%
KEGG_PATHWAYS_IN_CANCER	310	0.486132	1.82659	0	0.000479538	0.011	8971	tags=50%, list=31%, signal=72%
KEGG_GLYCOSAMINOGLYCAN_BIOSYNTHESIS_CHONDROITIN_SULFATE	22	0.609148	1.8217	0	0.000543378	0.013	9463	tags=82%, list=33%, signal=121%
KEGG_COLORECTAL_CANCER	60	0.535323	1.80468	0	0.000681877	0.017	8851	tags=48%, list=31%, signal=69%
KEGG_B_CELL_RECEPTOR_SIGNALING_PATHWAY	69	0.524566	1.79951	0	0.000732574	0.019	6317	tags=51%, list=22%, signal=65%
KEGG_LEUKOCYTE_TRANSENDOTHELIAL_MIGRATION	109	0.505316	1.79943	0	0.000705442	0.019	7099	tags=52%, list=25%, signal=69%
KEGG_CYTOSOLIC_DNA_SENSING_PATHWAY	43	0.543897	1.78395	0	0.000859865	0.024	6080	tags=51%, list=21%, signal=65%
KEGG_TOLL_LIKE_RECEPTOR_SIGNALING_PATHWAY	83	0.506526	1.76797	0	0.000899788	0.026	7565	tags=55%, list=26%, signal=75%
KEGG_MAPK_SIGNALING_PATHWAY	243	0.476727	1.76303	0	0.00096999	0.029	10259	tags=55%, list=35%, signal=85%
KEGG_FOCAL_ADHESION	192	0.480775	1.76153	0	0.0009387	0.029	9560	tags=56%, list=33%, signal=83%
KEGG_TIGHT_JUNCTION	122	0.490203	1.75593	0	0.000971865	0.031	6844	tags=44%, list=24%, signal=58%
KEGG_INSULIN_SIGNALING_PATHWAY	129	0.48735	1.75491	0	0.000972718	0.032	8851	tags=47%, list=31%, signal=67%
KEGG_VIBRIO_CHOLERAE_INFECTION	51	0.527125	1.75125	0	0.00100293	0.034	9027	tags=59%, list=31%, signal=85%
KEGG_PHOSPHATIDYLINOSITOL_SIGNALING_SYSTEM	72	0.50814	1.7446	0	0.00100318	0.035	8634	tags=51%, list=30%, signal=73%
KEGG_RNA_POLYMERASE	29	0.559907	1.73747	0	0.0010031	0.036	6990	tags=45%, list=24%, signal=59%
KEGG_ECM_RECEPTOR_INTERACTION	80	0.502631	1.73682	0	0.000975986	0.036	10094	tags=69%, list=35%, signal=105%
KEGG_PROXIMAL_TUBULE_BICARBONATE_RECLAMATION	21	0.581369	1.7248	0.00100604	0.00108234	0.041	1993	tags=29%, list=7%, signal=31%
